# Supplementary material for: Transcription factor EB overexpression prevents neurodegeneration in experimental synucleinopathies
Source: JCI journal article supplement (doi:10.1172/jci.insight.129719), 2019-08-21

## SUPPLEMENTAL INFORMATION

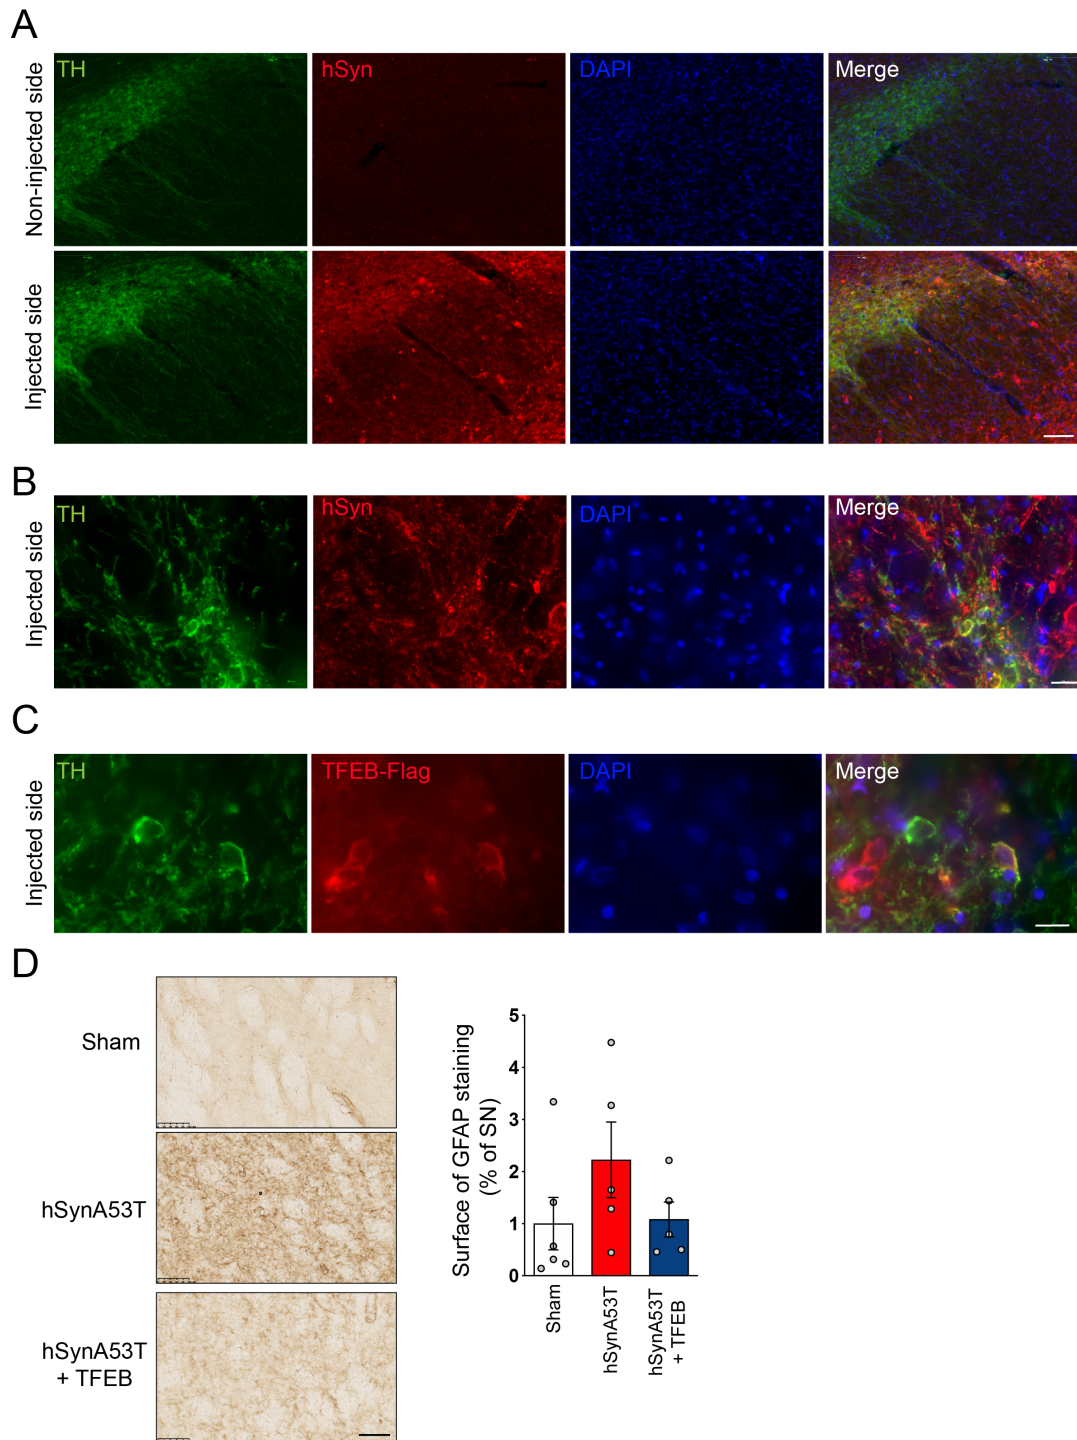

**Supplementary Figure 1. Virus transduction and astrogliosis in the human A53T- $\alpha$ -syn rat model of Parkinson's disease. (A-B)** AAV-delivered human A53T  $\alpha$ -syn is expressed in TH-positive neurons in the SNpc as revealed by anti-human  $\alpha$ -syn immunodetection. Scale bars = 100 $\mu$ m (A), 20 $\mu$ m (B). **(C)** AAV-mediated TFEB-3xFLAG is expressed in TH-positive neurons in the SNpc as revealed by anti-FLAG immunodetection. Scale bar = 20 $\mu$ m. **(D)** TFEB overexpression decreases astrogliosis associated with human A53T mutant  $\alpha$ -syn overexpression in the striatum. Representative pictures and surface quantification of GFAP immunostaining. Scale bar = 100 $\mu$ m.

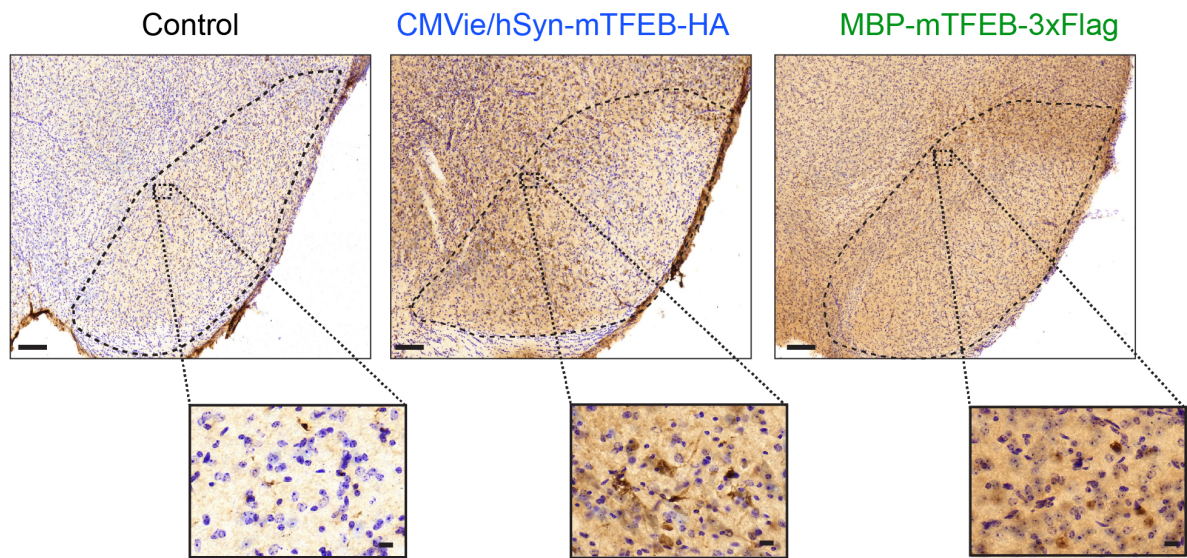

**Supplementary Figure 2. Virus transduction in the Substantia Nigra of TFEB-injected mice.** Representative images of virus transduction in the SN of control and TFEB-injected mice using immunostaining against HA tag for CMVie/hSyn-mTFEB group and Flag tag for MBP-mTFEB group. Scale bars = 200 $\mu$ m, 20 $\mu$ m (inset).

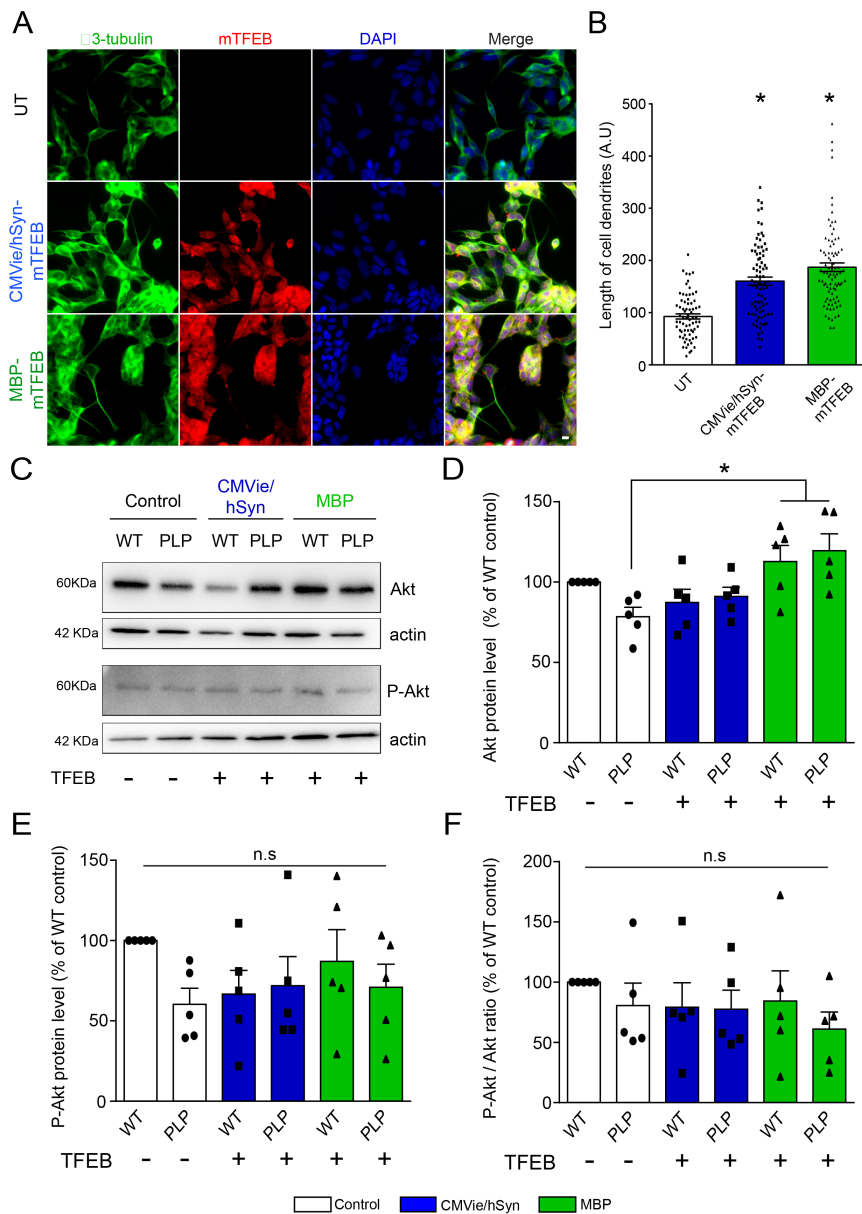

**Supplementary Figure 3. TFEB-mediated neurotrophic effect *in vitro* in the dendritic length.** (A) Illustrative images using  $\beta$ 3-tubulin (green) and TFEB (red) antibodies in BE(2)-M17 human dopaminergic neuroblastoma cells treated with 5 $\mu$ M retinoic acid for 24h and transfected or not with TFEB-encoding plasmids for 48h. (B) Quantification of the dendritic length in non-transfected cells (UT, n= 71, white bar), CMVie/hSyn-mTFEB (n = 83, blue bar) and MBP-TFEB-transfected cells (n= 88, green bar) expressed in arbitrary unit (A.U). Scale bar = 10 $\mu$ m. (C) Representative images of Akt and phosphorylated Akt (P-Akt) immunoblotting in the ipsilateral SN of Control, CMVie/hSyn-mTFEB-injected and MBP-mTFEB- injected WT and PLP mice. (D-E-F) Quantification of Akt (D), Phospho-Akt (E) and the ratio P-Akt/Akt (F) protein levels expressed in percentage of WT control mice in the ipsilateral SN of Control, CMV-mTFEB-injected and MBP-mTFEB-injected WT and PLP mice. n=5 per group. White bars: control; blue bars: CMVie/hSyn-mTFEB-HA; green bars: MBP-mTFEB-3xFlag. Data represent mean +/- SEM. In B, comparisons were made using One-Way ANOVA and Tukey's correction for multiple comparisons. \*p< 0.05 compared to control non-transfected cells. In D-E-F, comparisons were made using Two-Way ANOVA and Tukey's correction for multiple comparisons. \*p< 0.05 compared to Control PLP animals. n.s: not significant.

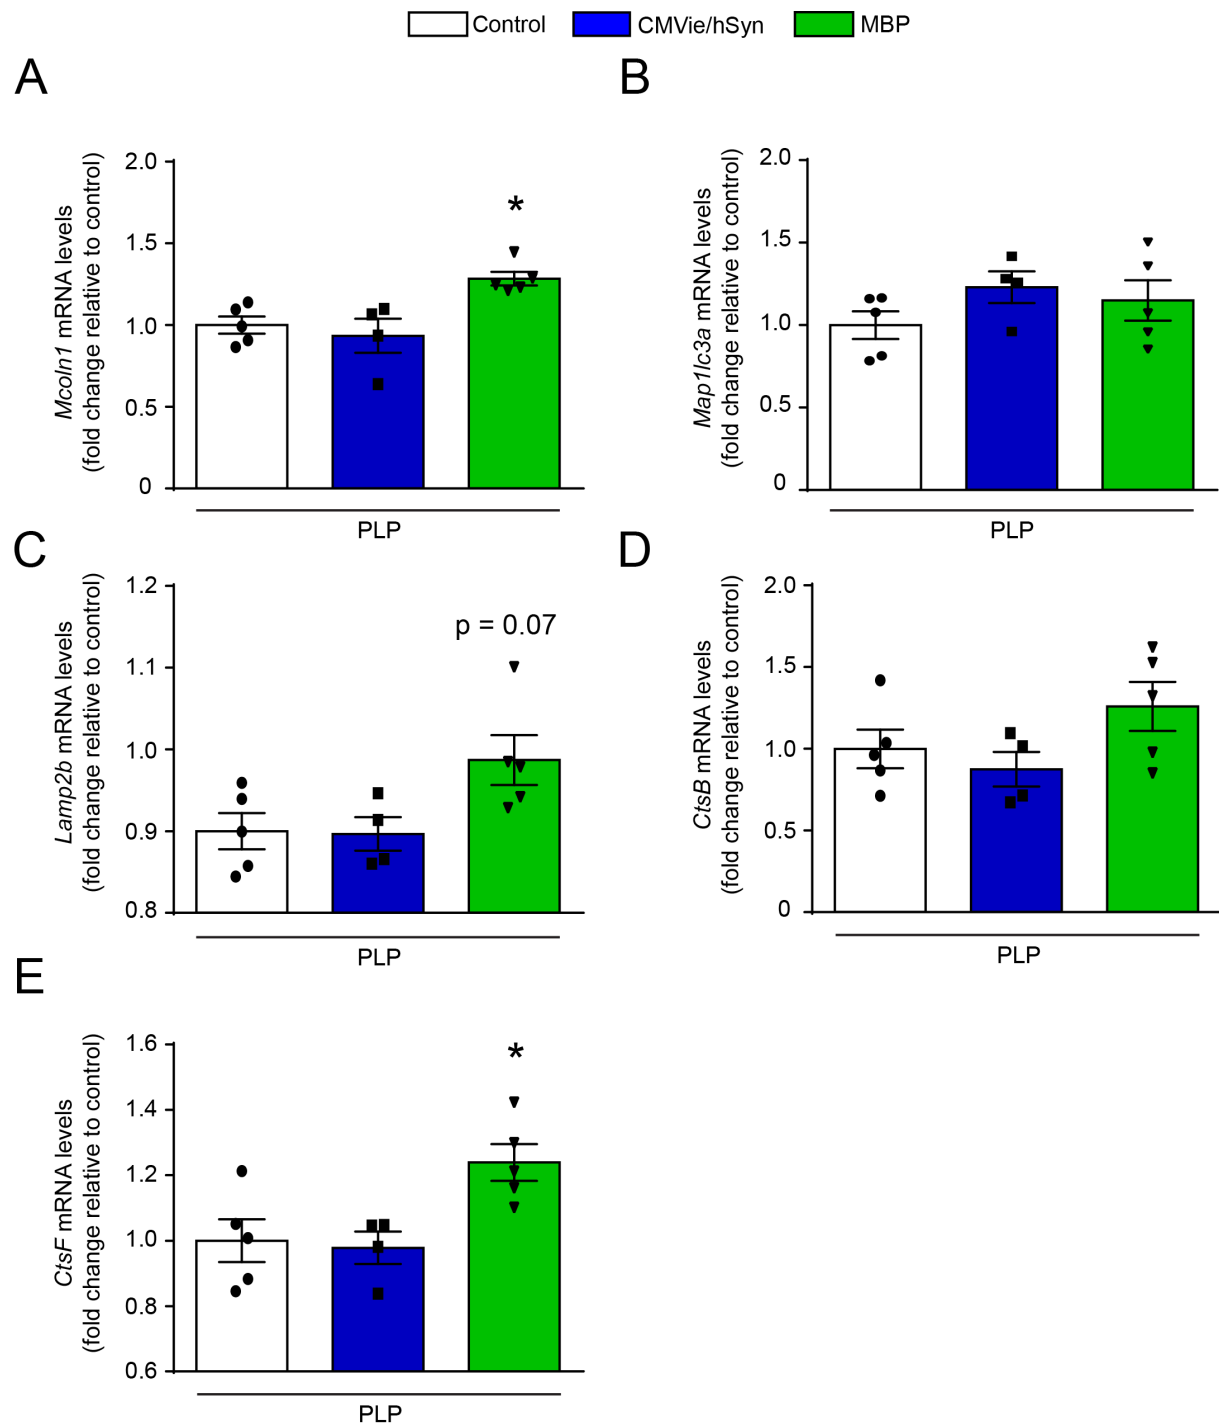

**Supplementary Figure 4. Gene expression analysis of *Tfeb* lysosomal targets in the Substantia Nigra of TFEB-injected PLP mice.** mRNA levels measured by quantitative PCR in SN patches of control and TFEB-injected PLP mice of *Mcoln1* (A), *Map1lc3a* (B), *Lamp2b* (C), *CtsB* (D) and *CtsF* (E) genes. n=4-5 per group. White bars: Control; Blue bars: CMVie/hSyn-mTFEB-HA, Green bars: MBP-mTFEB-3xFlag. Data represent mean +/- SEM. Comparisons were made using One-Way ANOVA and Tukey's correction for multiple comparisons. \*p< 0.05 compared to control PLP mice.

**A. Parkinson's Disease**

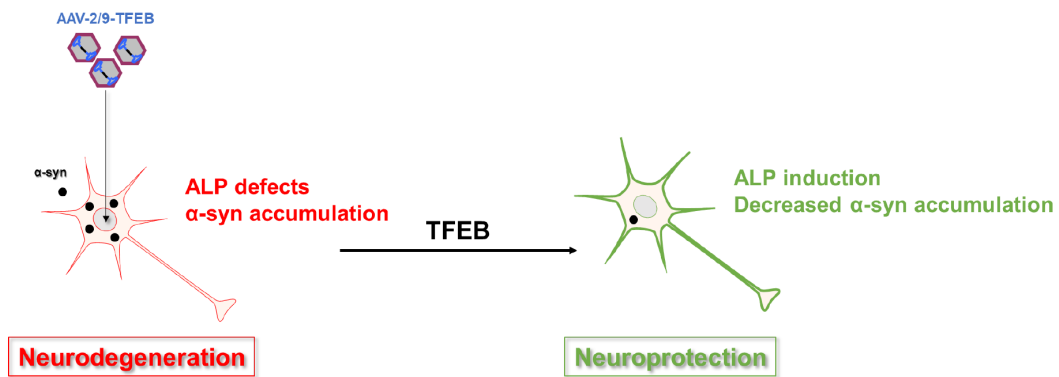

**B. Multiple system atrophy**

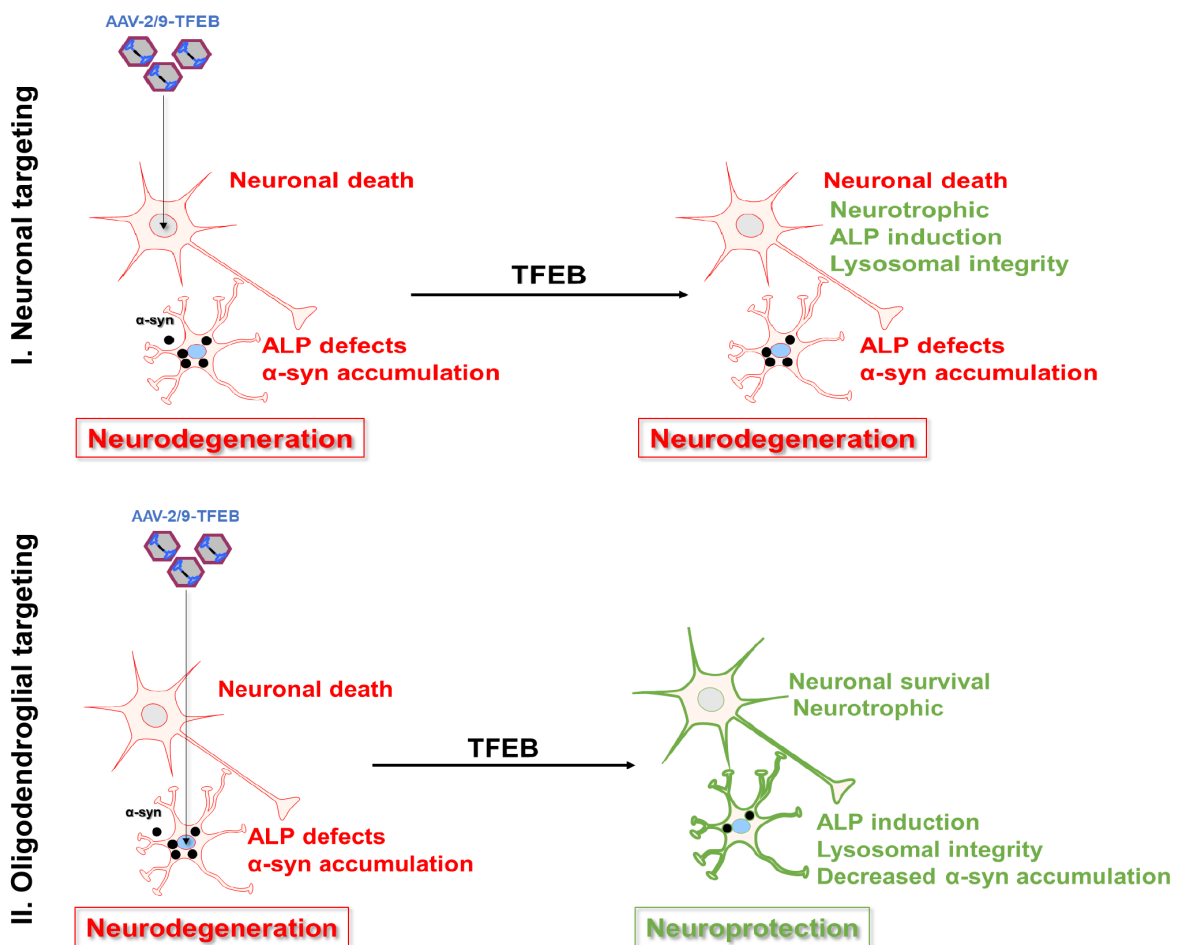

**Supplementary Figure 5. Cell-specific targeting of TFEB overexpression as a therapeutic strategy to prevent neurodegeneration in synucleinopathies. (A)** Overexpressing TFEB in dopaminergic neurons led to neuroprotective effects associated with decreased  $\alpha$ -synuclein levels linked to ALP enhancement in a rat model of Parkinson's Disease. **(B) (I.)** Overexpressing TFEB in dopaminergic neurons induces neurotrophic effects but not neuroprotective effects in MSA mice model. **(II.)** Overexpressing TFEB in oligodendrocytes induces neurotrophic effects but also neuroprotective effects associated with decreased  $\alpha$ -synuclein levels and ALP enhancement in a mice model of MSA.

**Supplementary Table 1. Demographics of healthy control subjects and MSA patients obtained from GIE Neuro-CEB BB-0033-00011 used in this study.** PMI: post-mortem interval, M: male, F: female, MSA-p: Multiple system atrophy, parkinsonian type.

| <b>Numbers</b> | <b>Diagnosis</b> | <b>Age (y)</b> | <b>Sex</b> | <b>PMI (h)</b> | <b>Tissue</b> |                |
|----------------|------------------|----------------|------------|----------------|---------------|----------------|
| 1              | Normal control   | 84             | M          | 15.5           | Putamen       | Frontal Cortex |
| 2              | Normal control   | 79             | M          | Nd             | Putamen       | Frontal Cortex |
| 3              | Normal control   | 69             | M          | 6              | Putamen       | Frontal Cortex |
| 4              | Normal control   | 83             | F          | 21             | Putamen       | Frontal Cortex |
| 5              | Normal control   | 80             | M          | 4              | Putamen       | Frontal Cortex |
| 6              | Normal control   | 78             | M          | 23             | Putamen       | Frontal Cortex |
| 7              | MSA-p            | 54             | M          | 5.25           | Putamen       | Frontal Cortex |
| 8              | MSA-p            | 64             | F          | 6.5            | Putamen       | Frontal Cortex |
| 9              | MSA-p            | 60             | F          | Nd             | Putamen       | Frontal Cortex |
| 10             | MSA-p            | 57             | F          | 7              | Putamen       | Frontal Cortex |
| 11             | MSA-p            | 75             | M          | 72             | Putamen       | Frontal Cortex |
| 12             | MSA-p            | 78             | F          | 48             | Putamen       | Frontal Cortex |
| 13             | MSA-p            | 77             | M          | 39             | Putamen       | Frontal Cortex |

Full unedited gel for Figure 2A

Nuclear fraction

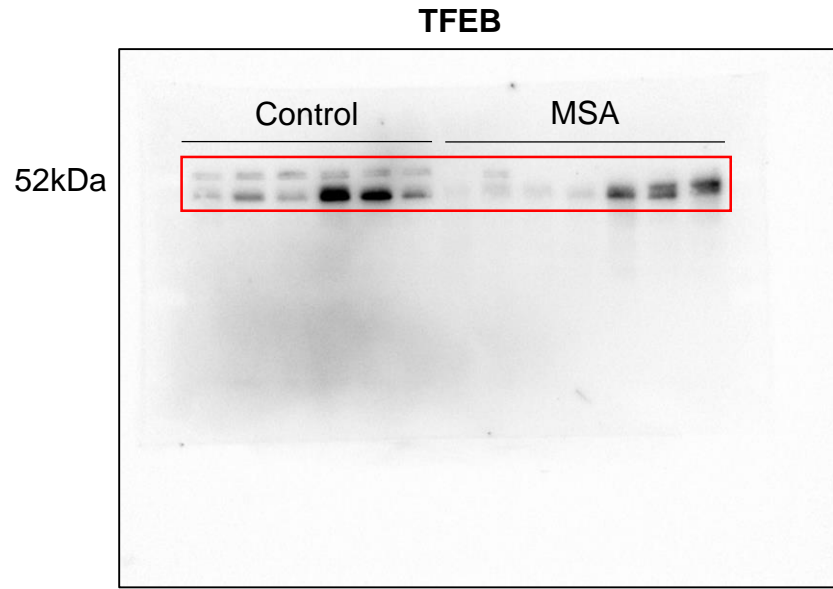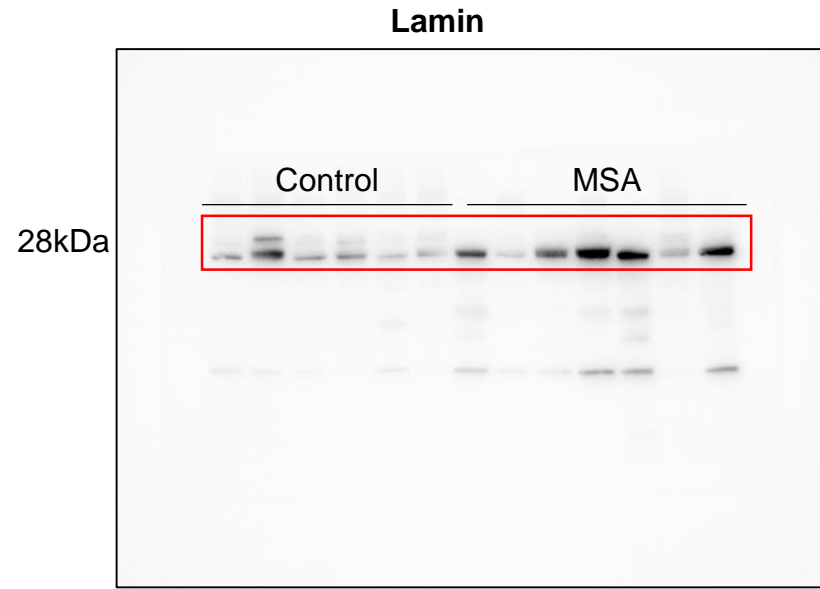

Cytosolic fraction

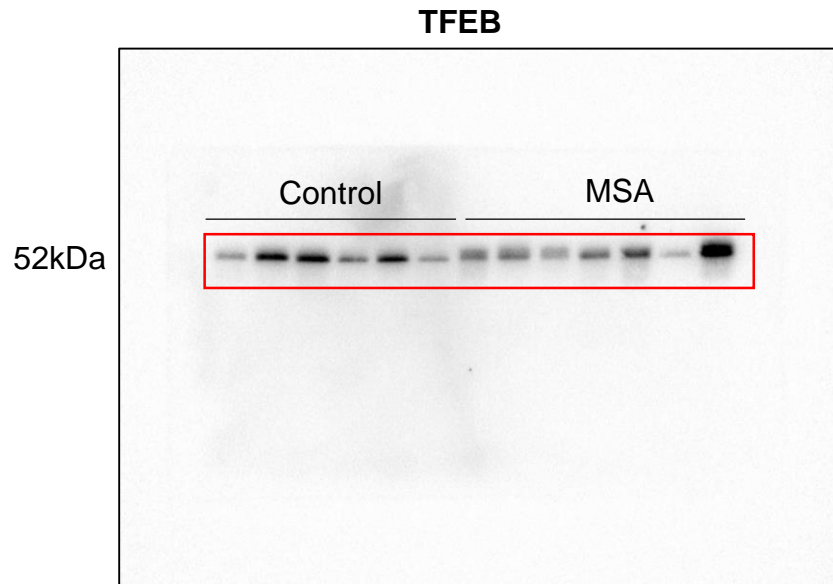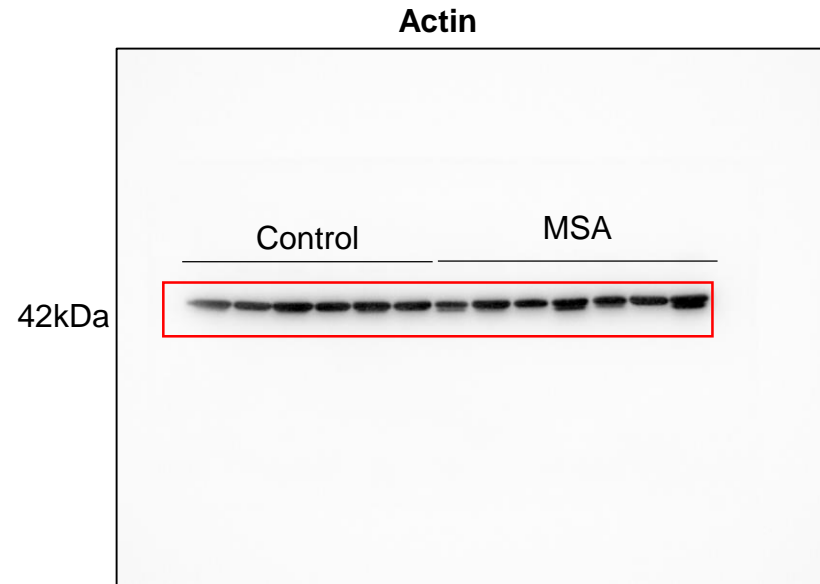

Full unedited gel for Figure 2C

Nuclear fraction

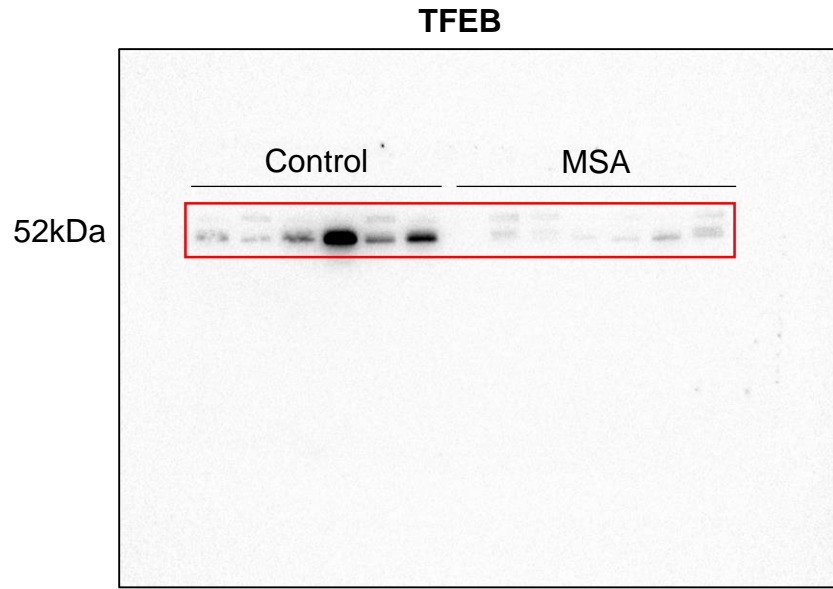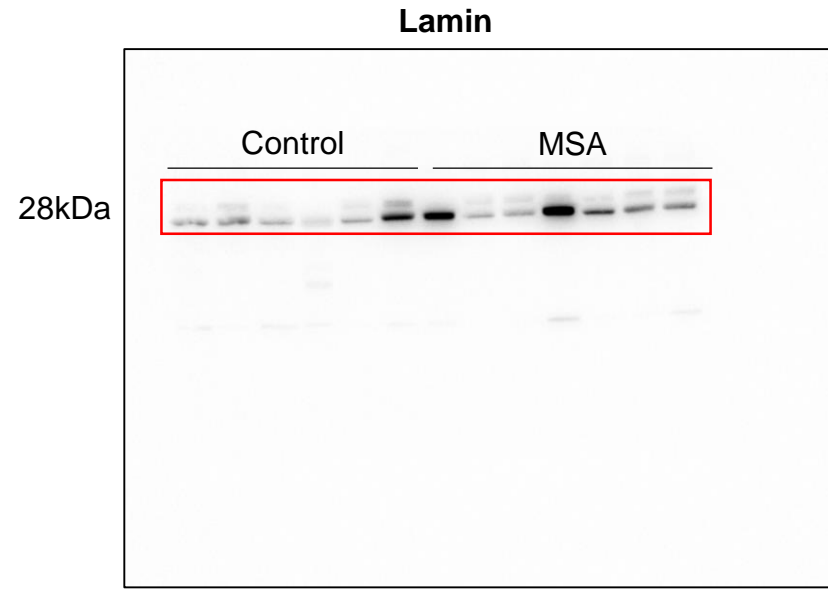

Cytosolic fraction

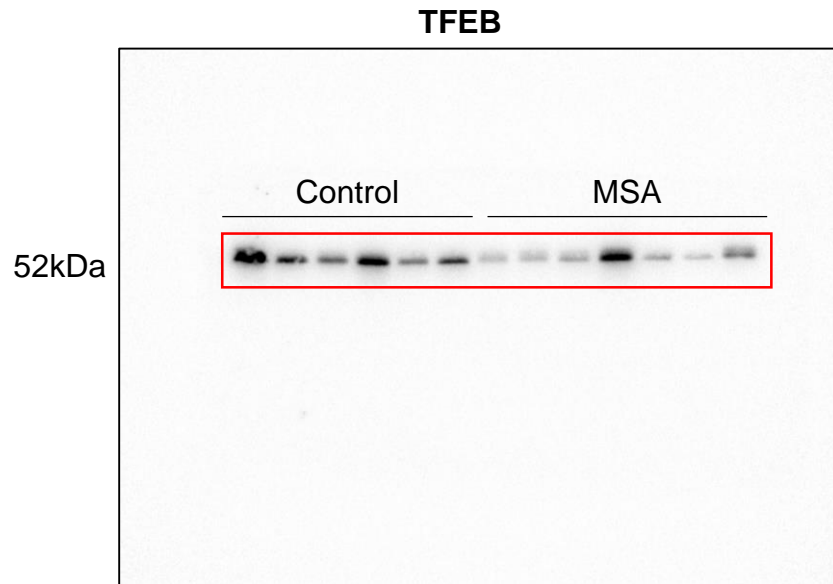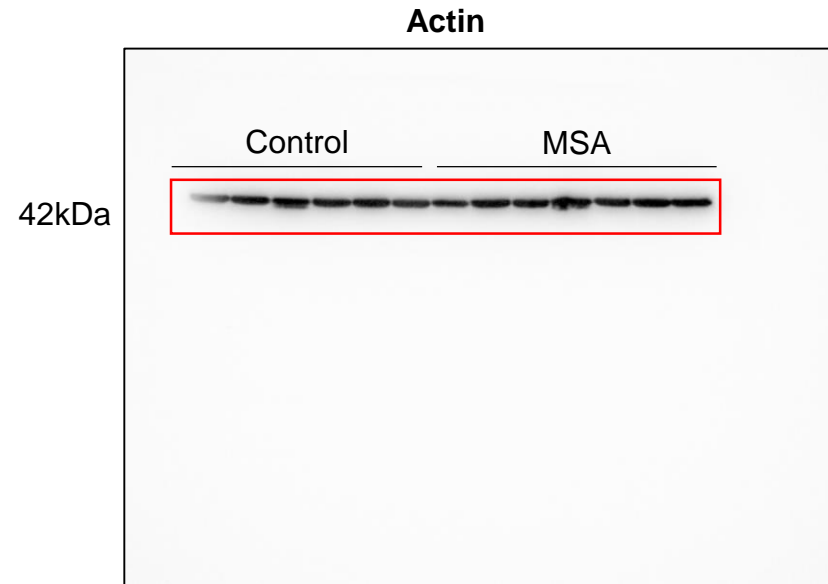



# Full unedited gel for Figure 3A

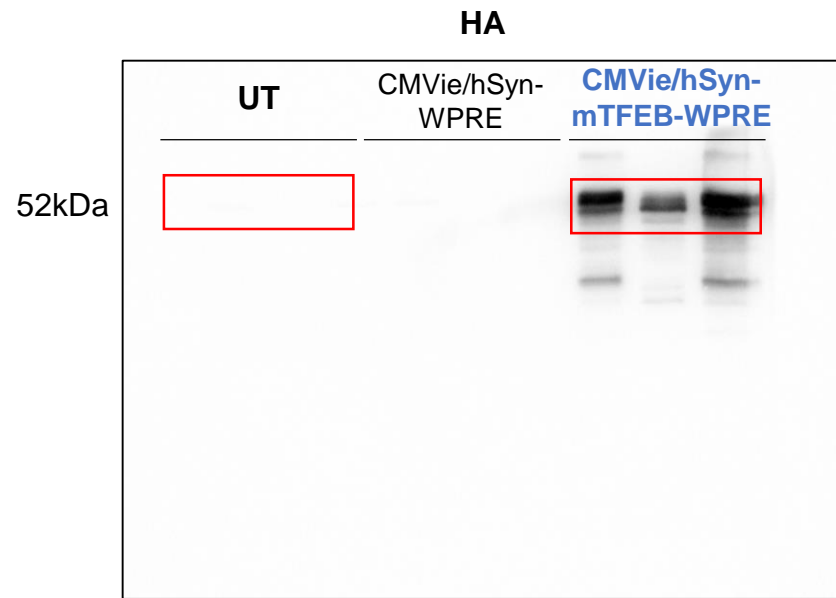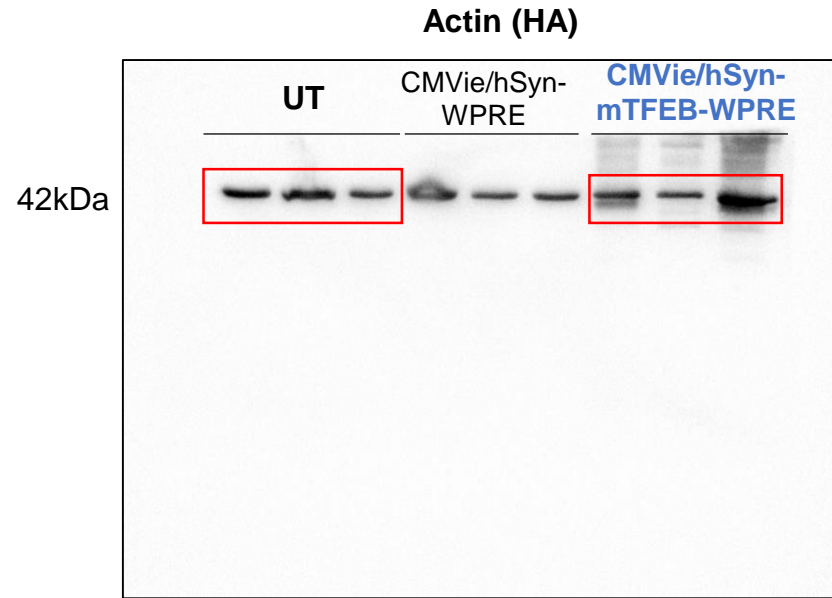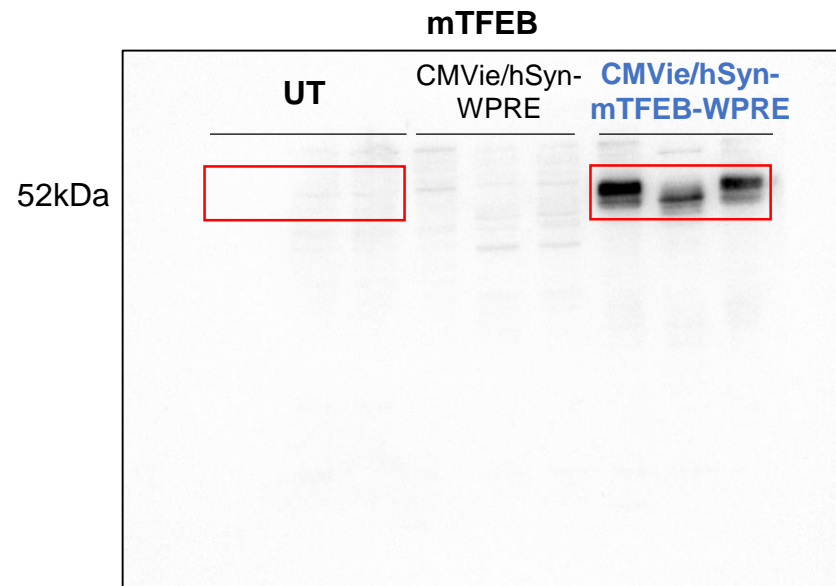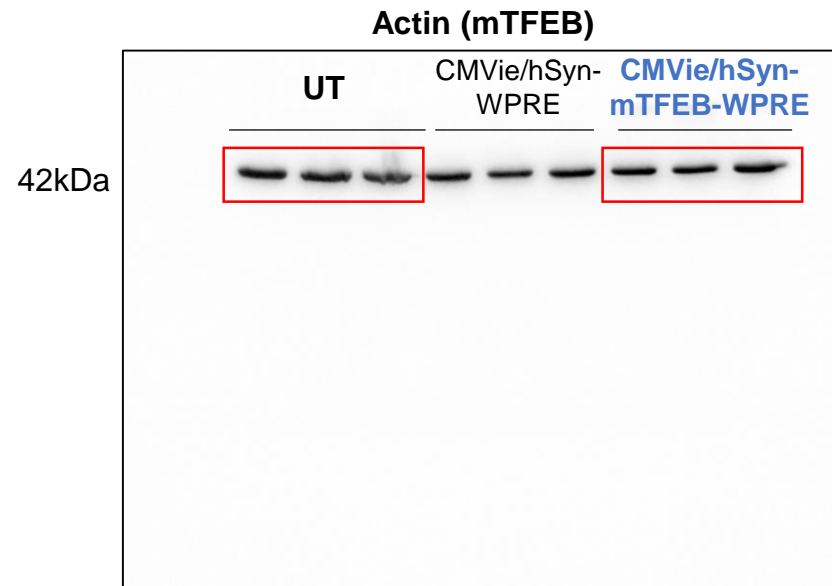

# Full unedited gel for Figure 3B

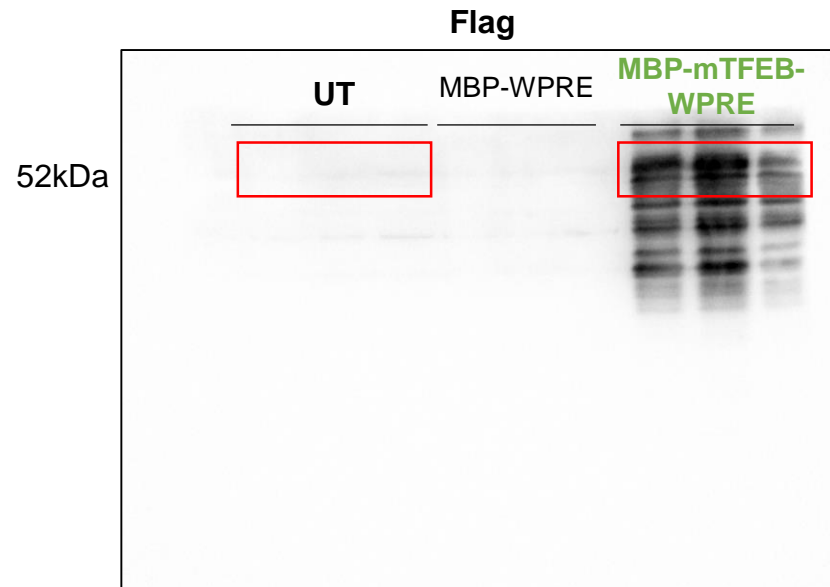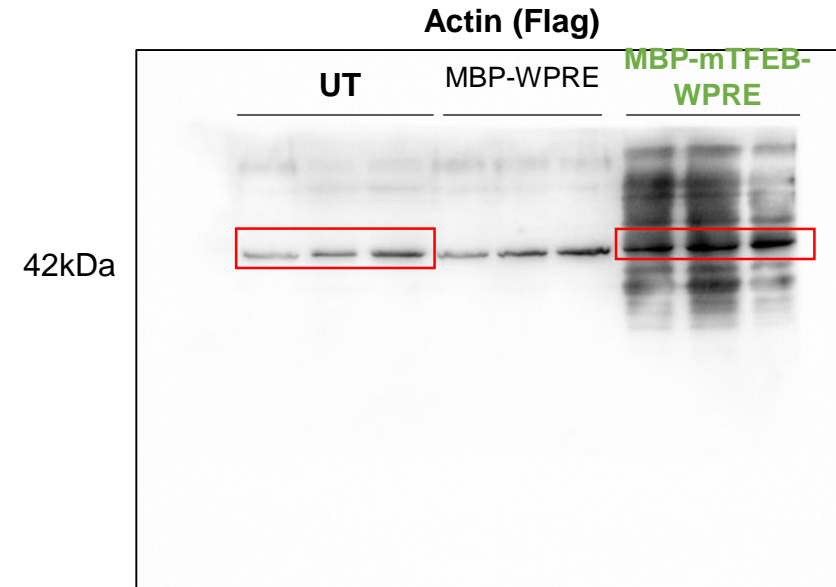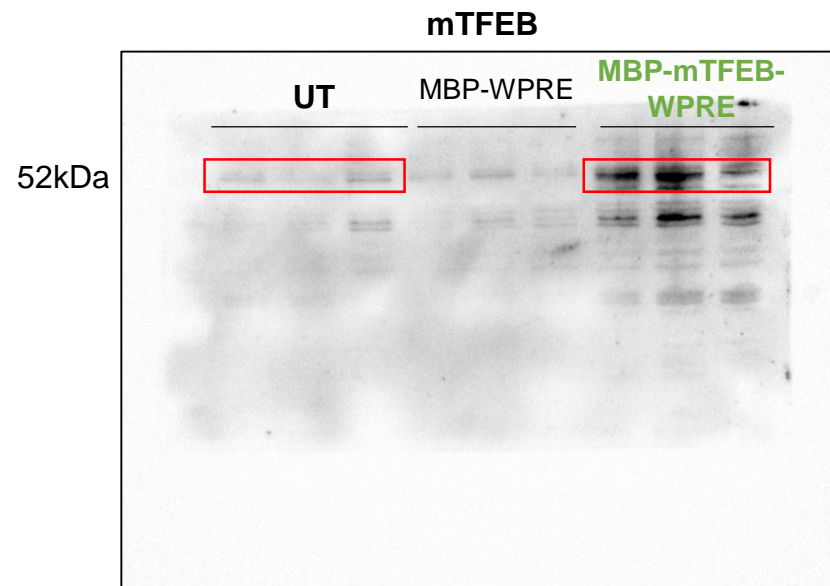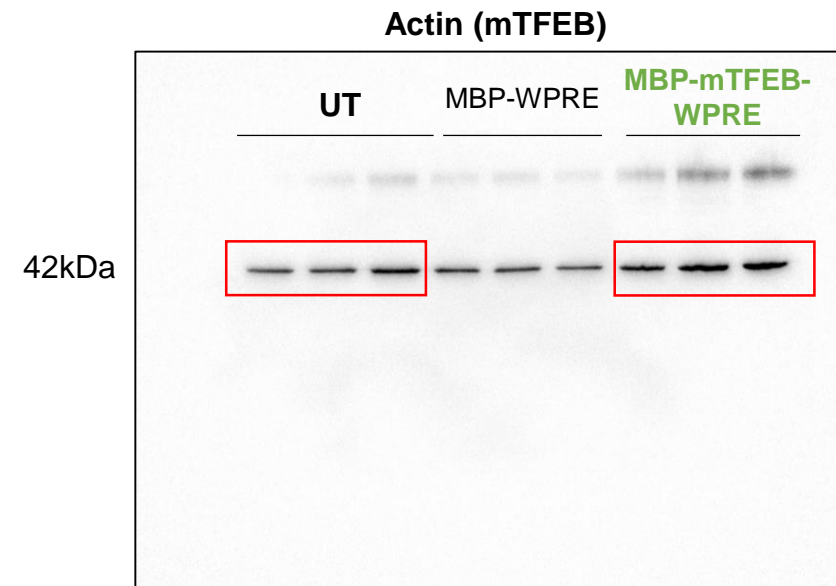

Full unedited gel for Figure 3D

HA

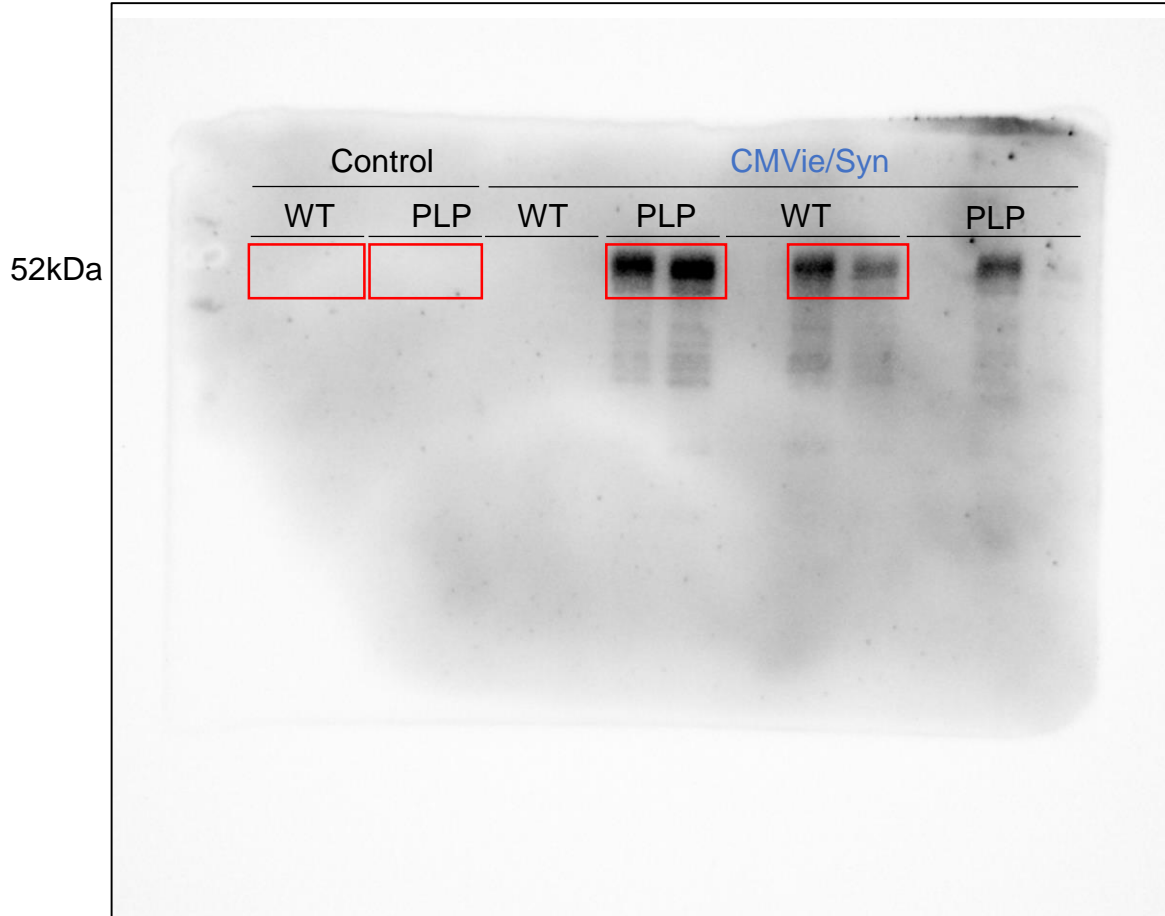

Actin

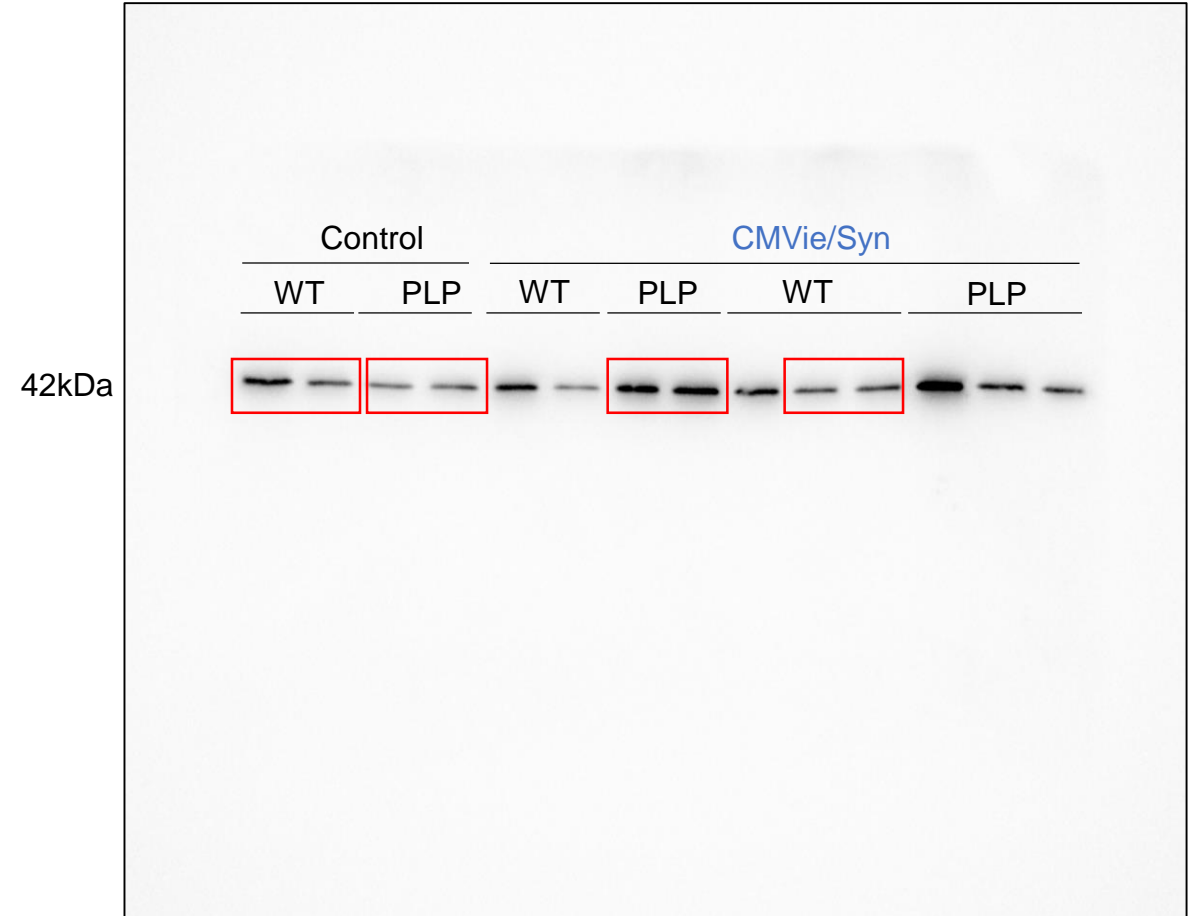



# Full unedited gel for Figure 8B

## CTSD

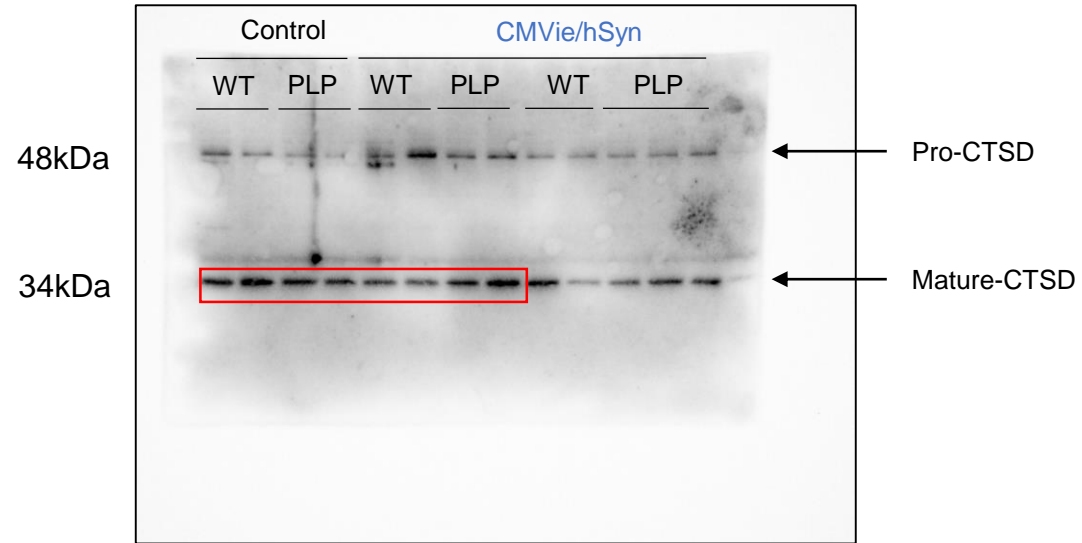

## Actin

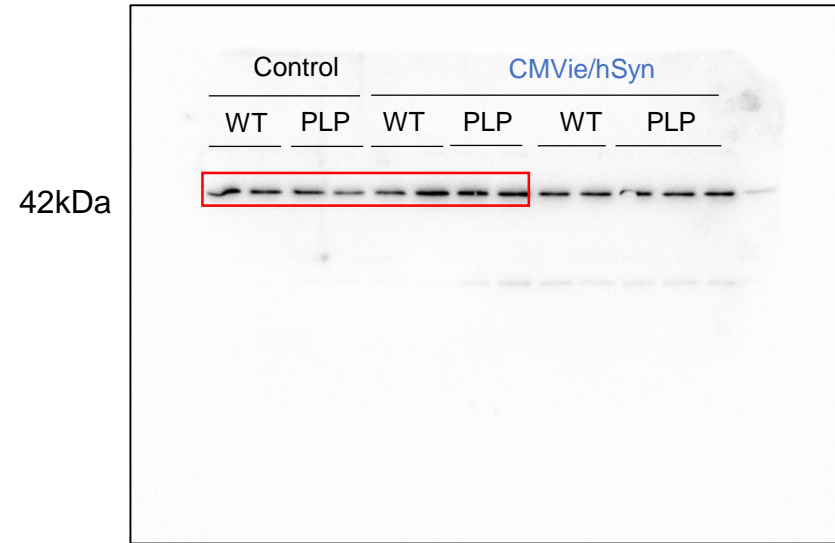

## CTSD

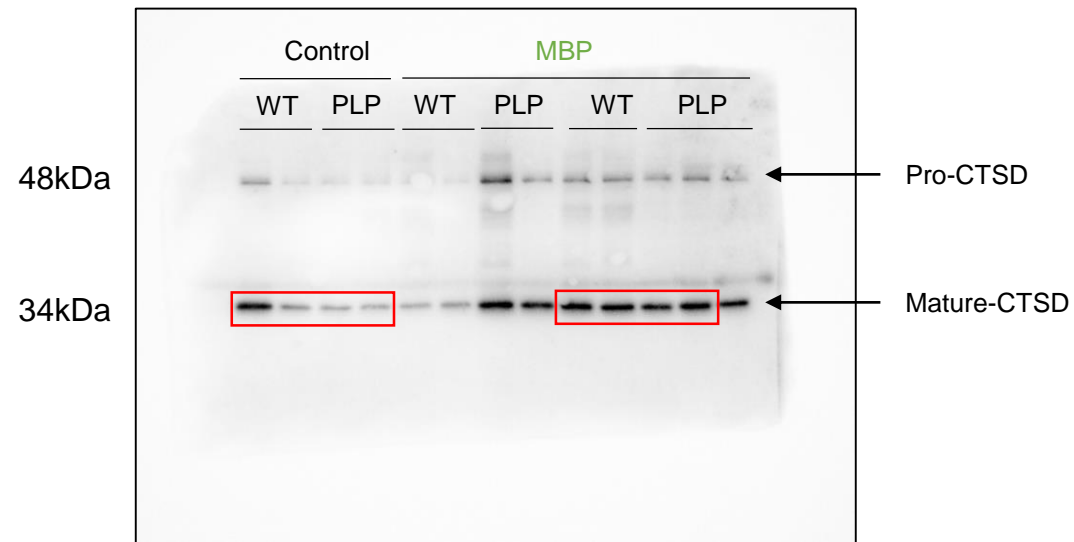

## Actin

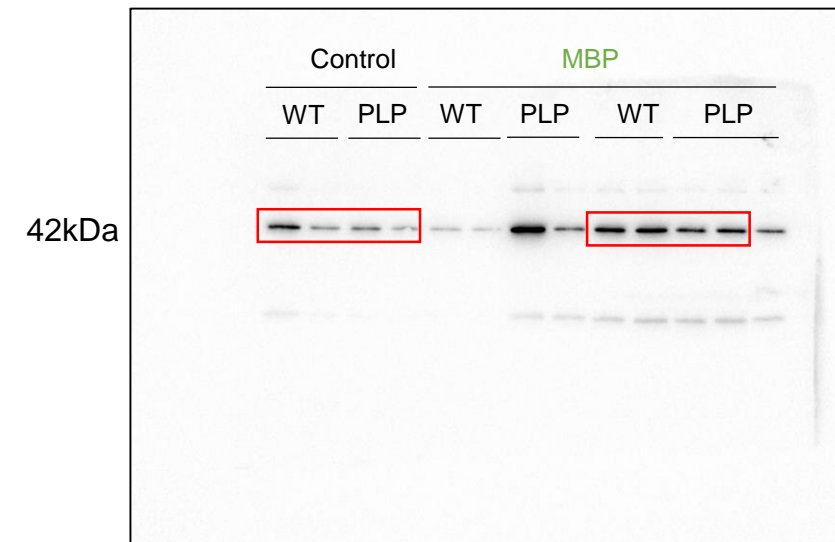

# Full unedited gel for Supplemental Figure S3C

Akt

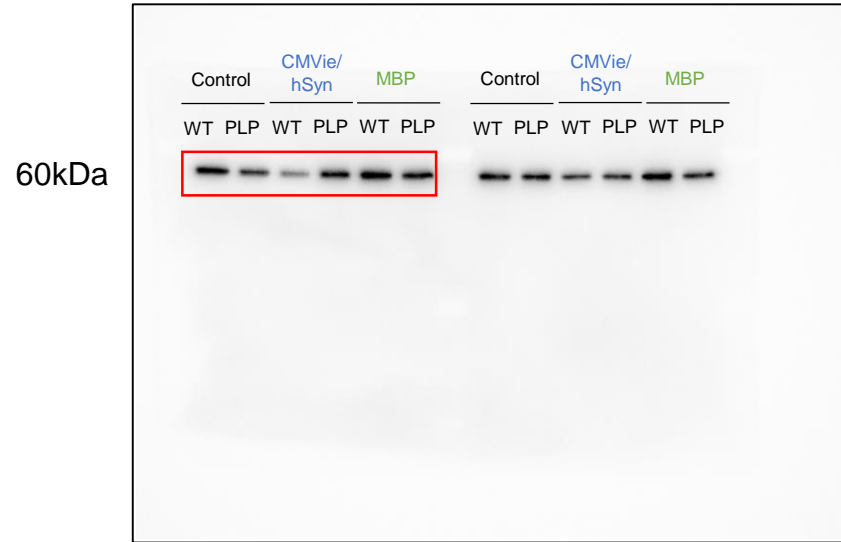

Actin (Akt)

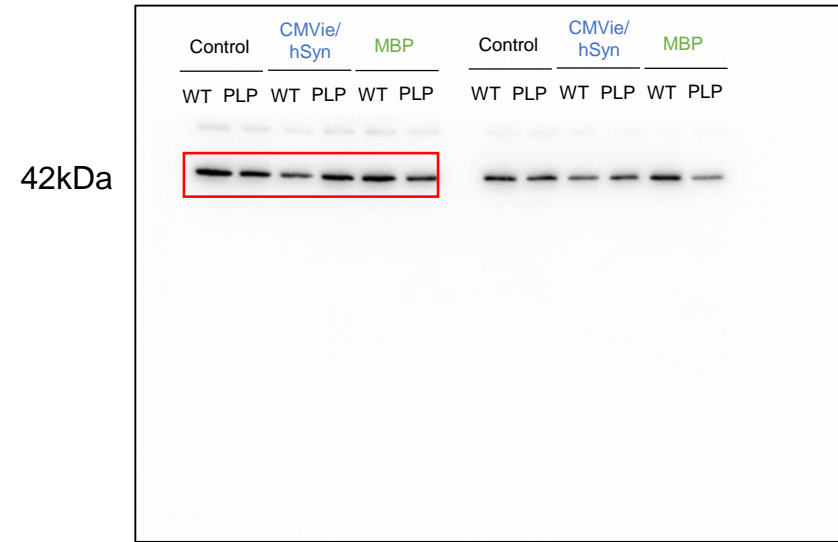

Phospho-Akt

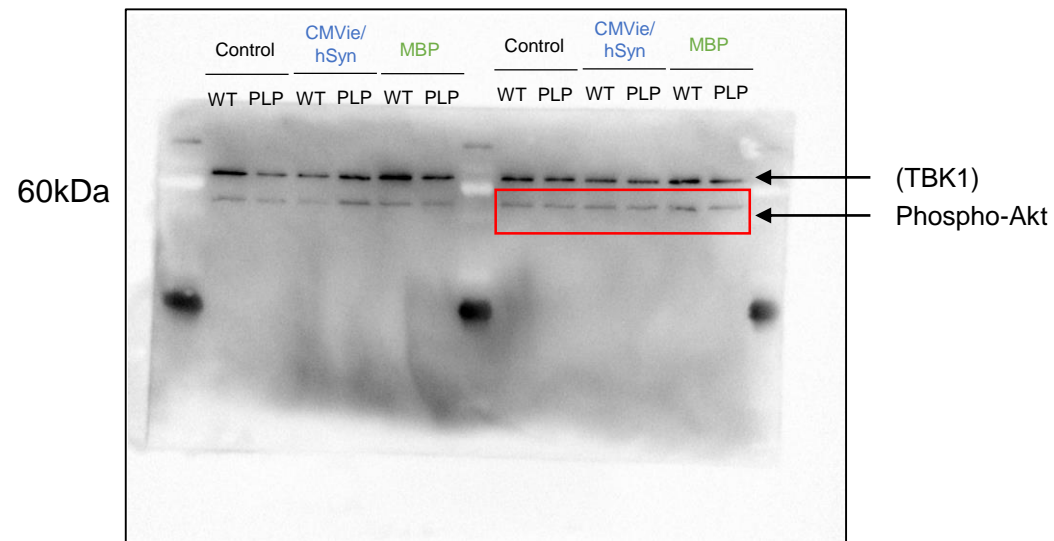

Actin (Phospho-Akt)

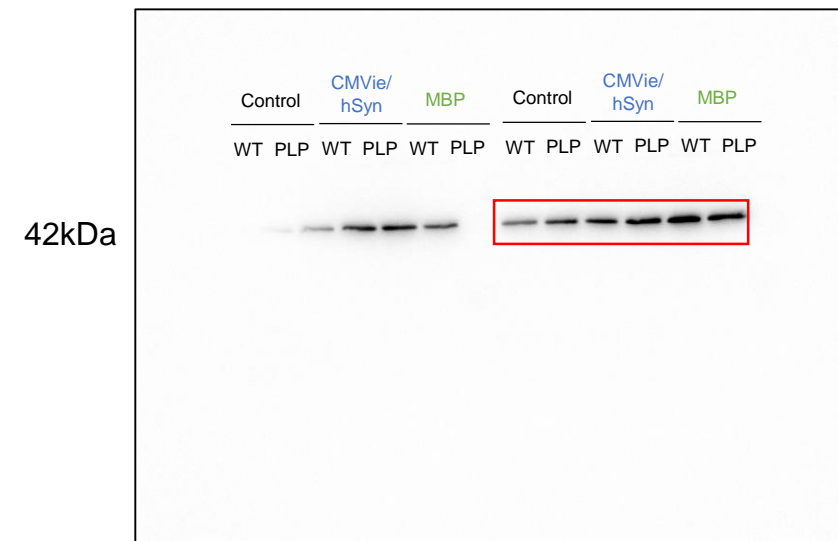

Supplement: sd1 [file 1]
